# Supplementary material
Source: publisher site journal article supplement (https://www.dovepress.com/article/451307)
Supplement: Supplementary file 1 [file get_supplementary_file.php]

Supplemental table 1 Correlation of C4/IgG and macroproteinuria in different CKD stages

|      | OR      | P      |
|------|---------|--------|
| CKD1 | 1.932   | 0.26   |
| CKD2 | 2.533   | 0.034* |
| CKD3 | 14.946  | 0.000# |
| CKD4 | 533.948 | 0.001# |
| CKD5 | 2.036   | 0.615  |

\* $P < 0.05$ , # $P < 0.01$ .

Supplemental table 2 Influence factors of macroproteinuria in IgA subgroup patients

|        | OR     | 95%CI         | P      |
|--------|--------|---------------|--------|
| gender | 1.53   | 0.317-7.392   | 0.597  |
| age    | 1.027  | 0.98-1.077    | 0.269  |
| IgA    | 1.183  | 0.633-2.213   | 0.598  |
| IgM    | 2.472  | 0.793-7.698   | 0.118  |
| Tg     | 1.217  | 0.733-2.021   | 0.448  |
| IgG    | 0.54   | 0.364-0.802   | 0.002# |
| LnC4   | 38.092 | 1.752-828.162 | 0.021* |
| HDL    | 8.994  | 0.64-126.3    | 0.103  |
| LDL    | 1.129  | 0.642-2.314   | 0.545  |

IgA, immunoglobulin A; IgM, immunoglobulin M; TG, triglyceride; IgG, immunoglobulin G; C4, complement C4; HDL, high-density lipoprotein; LDL, low-density lipoprotein. \* $P < 0.05$ , # $P < 0.01$ .
